# **Association between diabetes and levels of micro-nutrients in a Middle Eastern population - A case-control study**

Nada Soliman, Ruba Almishal, Basant Elsayed, Ayaaz Ahmed, Sara Al-Amri, Aisha Al-Kuwari, Shaikha Al-Muhannadi, Muhammed Nadeer, Tawanda Chivese

College of Medicine, QU Health, Qatar University, Doha, Qatar

Corresponding author - Tawanda Chivese

College of Medicine, QU Health, Qatar University, P.O. Box 2713, Doha, Qatar

E-mail - [tchivese@qu.edu.qa](mailto:tchivese@qu.edu.qa)

Tel – 00974 4403 7831

## **Abstract**

### **Objective**

To investigate associations between levels of micronutrients and diabetes, controlled and uncontrolled diabetes.

### **Methods**

A case-control study, matched on age and gender, was performed on participants with (cases) and without diabetes (controls), who were Qatari or long-term residents. Participants with diabetes were divided into those with controlled and uncontrolled diabetes using an HbA1c cutoff of 7%. Levels of micronutrients were measured from serum and categorized into normal and abnormal levels.

### **Results**

A total of 1118 participants (374 cases and 744 controls) were included with a mean age of 41.7 years (SD 9.9), of whom 53.9% were female. Of those with diabetes, 229 had controlled diabetes and 145 had uncontrolled diabetes. Compared to those without diabetes, participants with diabetes had significantly lower mean magnesium (0.80 mmol/L (SD 0.07) vs 0.84 mmol/L (SD 0.06), respectively,  $p < 0.001$ ). Lower magnesium and iron were observed in participants with uncontrolled compared to participants with controlled diabetes. After multivariable logistic regression, diabetes was associated with hypomagnesemia (OR 3.2, 95% CI 3.4-213.9), and low iron (OR 1.49, 95% CI 1.03-2.15). Uncontrolled diabetes showed stronger odds of association with hypomagnesemia (OR 5.57, 95% CI 3.65-8.52).

### **Conclusion**

In an affluent setting in the Middle East and North Africa (MENA) region, diabetes was associated with low magnesium and low iron, and this association was worse in individuals with uncontrolled diabetes.

### **Keywords**

Diabetes mellitus, diabetes control, microelements, macro elements, vitamins, magnesium, Qatar Biobank (QBB)

## Introduction

The worldwide prevalence of diabetes mellitus is increasing and estimated to rise from 463 million in 2019 to 700 million by 2045 (1). The Middle East and North Africa (MENA) region has one of the highest age-adjusted comparative prevalence of diabetes in people aged 20–79 years at 12.2% (1). With a prevalence of diabetes around 16%, Qatar has the highest expenditure per person at approximately \$1,751 for diabetes (1). Uncontrolled diabetes is associated with a higher risk of complications and the need for frequent hospitalizations, which are associated with a higher cost of diabetes care. Therefore, there is a need to explore factors that may affect both the development and better control of diabetes in the MENA region.

Alterations in micronutrient intake and serum levels have been implicated in both the development and control of diabetes. Micronutrients are nutrients that the body requires in small amounts and can be divided into macro-elements, micro-elements (trace elements), and vitamins. These elements are involved in processes related to glucose metabolism; thus, they have been targeted as possible preventive or management options for diabetes. Macro-elements, such as calcium (Ca), magnesium (Mg), and iron (Fe), are elements required by adults in amounts exceeding 100 mg/day, while micro-elements like zinc (Zn) and copper (Cu) are needed in amounts between 1-100 mg/day (2, 3), Mg is involved in glucose metabolism (4), too much Fe can cause oxidative damage to  $\beta$ -cells, and Zn is crucial in insulin production (5). Vitamins also contribute to many different biological processes and have attracted some interest either as preventive or therapeutic agents for diabetes (6-8). Vitamin B9 (folate) and vitamin B12 aid in the conversion of homocysteine to methionine, thus reducing oxidative damage, which is common in diabetes, and frequently associated with peripheral neuropathy (9).

Despite the possible links between micro-nutrients and glucose metabolism, findings from both observational and experimental studies about their role in the development and control of diabetes have largely been heterogeneous. Several meta-analyses of RCTs (10-12) have produced conflicting results about the benefits of supplementation with micronutrients in individuals with diabetes, with some showing benefit and others showing no benefit. Therefore, there is a need to investigate the relationship between the levels of micronutrient levels and diabetes as well as whether these micronutrients play a part in the control of diabetes. In the

MENA region, only a few studies have investigated the relationship between diabetes and the levels of micronutrients, and studies are needed in this region which has a unique a high diabetes prevalence. The study aimed compare the levels of micro, and macro-elements, between individuals with and without diabetes. We also investigated the association between these micronutrients and uncontrolled diabetes.

## **Methods**

### **Design, population, and setting.**

A case control study, using data collected by Qatar Biobank (QBB), was conducted on Qatari citizens and long-term residents. The QBB is a population-based research initiative that creates a depository of biological samples and information on the health and lifestyle of Qatari citizens and long-term residents, aiming to prospectively recruit 60,000 volunteers (13, 14). Participants above 18 years of age with data on micronutrients were eligible for inclusion in the present study. During this study, participants with diabetes were randomly selected from the QBB database and matched, using age, gender and nationality, to those without diabetes. Participants without data on micronutrients, those aged below 18 years and pregnant women were excluded.

### **Data collection**

Each participant completed a questionnaire, had anthropometry measured, and had blood drawn for measuring serum micronutrients. The data collected for each participant were: demographics, data on self-reported doctor-diagnosed diabetes, duration of diabetes, nutritional supplement usage, income, smoking status, blood pressure, anthropometry, HbA1c level, serum levels of lipids, random glucose, and micronutrients. The micronutrients measured were copper (Cu), zinc (Zn), magnesium (Mg), iron (Fe), folate, and vitamin B12.

### **Diabetes measurements**

Participants were classified into the diabetes group if they self-reported being diagnosed by a doctor or if they had an HbA1c  $\geq 6.5\%$  or a random blood glucose level  $\geq 11.1$  mmol/L, according

to the American Diabetes Association (ADA) criteria (14). Controlled diabetes was defined based on ADA guidelines as  $HbA1c \leq 7\%$  (13).

### **Micro, macro elements and vitamins measurements**

For each participant, micronutrients were assessed from serum. Levels of micronutrients were classified as ‘low’ according to the normal laboratory ranges for adults on UpToDate (14), using the following cut-offs: Mg ( $\leq 0.66\text{mmol/L}$ ), Fe ( $\leq 9\ \mu\text{mol/L}$ ), Zn ( $\leq 11.5\ \mu\text{mol/L}$ ), Cu ( $\leq 15.7\ \mu\text{mol/L}$ ), folate ( $\leq 4.1\text{nmol/L}$ ), and vitamin B12 ( $\leq 147.5\text{pmol/L}$ ).

### **Ethics and informed consent**

At the QBB, participants gave written informed consent, before data were collected. This study received ethical approval from the Qatar University’s Institutional Review Board (QU-IRB) (reference number: QU-IRB1228-E/20), and the Qatar Biobank’s IRB (reference number: QF-QBB-RES-ACC-0186).

### **Data analysis**

Histograms were used to check for the normality of data distribution for measured variables. Descriptive data were presented as mean and standard deviation (SD) if normally distributed, or as median and interquartile range (IQR) if not normally distributed. Categorical variables were presented using frequencies and percentages. Boxplots were used to compare the levels of the micronutrients between participants without diabetes, those with controlled and participants with uncontrolled diabetes. The micronutrient levels were compared between participants with and without diabetes using the t-test for independent groups if normally distributed or Wilcoxon rank-sum test if not normally distributed. Comparisons of micronutrient levels between the three groups (controlled, uncontrolled, and no-diabetes) were tested using one-way ANOVA if data were normally distributed, or Dunntest if data were not normally distributed with post hoc test done using Bonferroni adjustment.

Multivariable logistic regression was carried out for the association between diabetes and the micronutrients, with separate models for each micronutrient. To investigate the association between micronutrients and uncontrolled diabetes, multivariable multinomial logistic regression was used, with “no diabetes” as the base-outcome. In all models, we adjusted for age, gender,

BMI, smoking, and income, as they are known to be associated with both micronutrients' intake and diabetes (15-17). For each multivariable regression model, we tested model specification using linktest. Exact p-values were reported and interpreted as evidence against null hypothesis and 95% confidence intervals (95% CI) were reported for odds ratios (OR). All data analyses were performed using Stata 16.0 statistical software.

## Results

### Characteristics of participants by diabetes status

A total of 1118 participants, of which 33.5% had diabetes, were included in the study. Participants with diabetes were slightly older than those without (mean age 44.4 years old (9.4) vs 40.3 years old (9.9),  $P < 0.001$ ). Participants with diabetes compared to those without, had significantly higher mean BMI ( $31.5 \text{ kg/m}^2$  (SD 5.4) vs  $29.8 \text{ kg/m}^2$  (SD 5.6), respectively,  $P < 0.001$ ) (Table 1).

**Table 1. Characteristics of participants by diabetes status**

| Characteristic                  | No diabetes    | Controlled diabetes | Uncontrolled diabetes | p-value |
|---------------------------------|----------------|---------------------|-----------------------|---------|
| N                               | 744            | 229                 | 145                   |         |
| Age in years, mean (SD)         | 40.3 (9.9)     | 43.8 (9.0)          | 45.3 (9.9)            | <0.001  |
| Female                          | 404 (54.3%)    | 128 (55.9%)         | 71 (49.0%)            | 0.40    |
| Male                            | 340 (45.7%)    | 101 (44.1%)         | 74 (51.0%)            |         |
| Non-Qatari                      | 107 (14.4%)    | 31 (13.5%)          | 24 (16.6%)            | 0.71    |
| Qatar                           | 637 (85.6%)    | 198 (86.5%)         | 121 (83.4%)           |         |
| Primary                         | 465 (62.7%)    | 87 (38.0%)          | 98 (68.1%)            | <0.001  |
| Secondary/ high school          | 127 (17.1%)    | 53 (23.1%)          | 14 (9.7%)             |         |
| Tertiary                        | 150 (20.2%)    | 89 (38.9%)          | 32 (22.2%)            |         |
| Employed                        | 531 (71.4%)    | 168 (73.4%)         | 91 (62.8%)            | 0.069   |
| Monthly salary (QAR)            |                |                     |                       |         |
| <10 000                         | 134 (19.3%)    | 36 (16.7%)          | 37 (28.0%)            | 0.12    |
| 10-20 000                       | 168 (24.2%)    | 51 (23.7%)          | 30 (22.7%)            |         |
| >20 000                         | 393 (56.5%)    | 128 (59.5%)         | 65 (49.2%)            |         |
| HBA 1C %, median (IQR)          | 5.2 (5.0, 5.4) | 6.0 (5.5, 6.4)      | 7.8 (7.4, 8.9)        | <0.001  |
| BMI, mean (SD)                  | 29.8 (5.6)     | 31.2 (5.2)          | 31.9 (5.7)            | <0.001  |
| Waist-hip ratio, mean (SD)      | 0.8 (0.1)      | 0.9 (0.1)           | 0.9 (0.1)             | <0.001  |
| Cholesterol Total, median (IQR) | 5.0 (4.4, 5.6) | 5.0 (4.3, 5.5)      | 5.0 (4.3, 5.7)        | 0.58    |
| HDL-Cholesterol, median (IQR)   | 1.4 (1.1, 1.6) | 1.2 (1.0, 1.5)      | 1.2 (1.0, 1.5)        | <0.001  |
| Triglyceride, median (IQR)      | 1.1 (0.8, 1.4) | 1.4 (1.0, 1.9)      | 1.5 (1.0, 2.2)        | <0.001  |

|                                    |                |                |                |        |
|------------------------------------|----------------|----------------|----------------|--------|
|                                    | 1.5)           |                |                |        |
| LDL-Cholesterol Calc, median (IQR) | 3.0 (2.5, 3.5) | 3.0 (2.4, 3.5) | 2.9 (2.3, 3.5) | 0.24   |
| Dyslipidaemia                      | 249 (33.5%)    | 101 (44.1%)    | 67 (46.2%)     | <0.001 |
| Systolic BP, mean (SD)             | 112.4 (13.3)   | 117.9 (14.3)   | 124.1 (17.5)   | <0.001 |
| Diastolic BP, mean (SD)            | 67.4 (10.2)    | 70.5 (10.3)    | 74.0 (11.7)    | <0.001 |
| Hypertension                       | 128 (29.0%)    | 28 (41.2%)     | 46 (54.1%)     | <0.001 |
| DM family history                  | 195 (32.8%)    | 108 (65.9%)    | 75 (70.8%)     | <0.001 |
| Non-smoker                         | 27 (3.7%)      | 11 (5.0%)      | 4 (3.0%)       | 0.60   |
| Current smoker                     | 677 (92.0%)    | 198 (90.8%)    | 120 (90.2%)    |        |
| Ex-smoker                          | 32 (4.3%)      | 9 (4.1%)       | 9 (6.8%)       |        |
| Multivitamin supplements           | 239 (38.9%)    | 94 (51.1%)     | 45 (45.0%)     | 0.011  |

Percentages are column percentages. *n* is specified for variables with missing data.

Abbreviations: BMI (body mass index), HbA1c (glycated hemoglobin), HDL (High density lipoprotein), LDL (Low density lipoprotein), BP (Blood Pressure), SD (standard deviation), IQR (inter-quartile range)

• Dyslipidemia was defined as any participant with diagnosed dyslipidemia or any of the following: total cholesterol > 6.2 mmol/L, triglyceride > 2.3 mmol/L, low density lipoprotein (LDL) > 4.1, high density lipoprotein (HDL) < 1 mmol/L and < 1.3 mmol/L for males and females, respectively.

▪ Hypertension was defined as any participants with diagnosed hypertension or either systolic blood pressure > 130 mmHg or diastolic blood pressure > 80 mmHg

### Comparison of characteristics by controlled diabetes status.

As expected, median HbA1C was higher in the participants with uncontrolled diabetes, compared to those with controlled diabetes (7.8% (IQR 7.4-8.9) vs 6.0% (IQR 5.5-6.4), respectively,  $P < 0.001$ ) (Table 1). The median duration of diabetes for participants with uncontrolled diabetes was longer compared to the participants with controlled diabetes (7 years (IQR 4-13) vs 4 years (IQR 2-9), respectively,  $P < 0.001$ ). A greater percentage of participants with controlled diabetes reported taking multi-vitamins/minerals supplements compared to those with uncontrolled diabetes (51.1% vs 45.0%, respectively,  $P = 0.011$ )

### Comparison of micronutrients levels between participants with and without diabetes

Median serum levels of iron and folate were significantly higher in participants with diabetes compared to those without (Table 2). Median Mg serum levels were significantly lower in participants with diabetes, compared to those without diabetes (0.79 mmol/L (SD 0.07) vs. 0.84 mmol/L (SD 0.06),  $P < 0.001$ ). For categorized micronutrients, compared to participants without diabetes, a significantly higher proportion of participants with diabetes had low magnesium (48.9% vs 22.3%,  $p < 0.001$ ) (Table 2).

**Table 2. Comparison of nutrients levels between participants with and without diabetes**

| Factor                     | Level  | No diabetes          | Diabetes             | p-value | Controlled diabetes  | Uncontrolled diabetes | p-value |
|----------------------------|--------|----------------------|----------------------|---------|----------------------|-----------------------|---------|
| N                          |        | 744                  | 374                  |         | 229                  | 145                   |         |
| Iron, median (IQR)         |        | 14.6 (10.5, 18.7)    | 13.6 (9.7, 18.0)     | 0.036   | 13.4 (9.2, 18.0)     | 14.0 (10.0, 18.1)     | 0.11    |
| Categorised iron           | Normal | 603 (81.0%)          | 295 (78.9%)          | 0.39    | 178 (77.7%)          | 117 (80.7%)           | 0.54    |
|                            | Low    | 141 (19.0%)          | 79 (21.1%)           |         | 51 (22.3%)           | 28 (19.3%)            |         |
| Magnesium, median (IQR)    |        | 0.8 (0.8, 0.9)       | 0.8 (0.8, 0.8)       | <0.001  | 0.8 (0.8, 0.9)       | 0.8 (0.7, 0.8)        | <0.001  |
| Categorized magnesium      | Normal | 578 (77.7%)          | 191 (51.1%)          | <0.001  | 136 (59.4%)          | 55 (37.9%)            | <0.001  |
|                            | Low    | 166 (22.3%)          | 183 (48.9%)          |         | 93 (40.6%)           | 90 (62.1%)            |         |
| Zinc Level, median (IQR)   |        | 12.4 (11.1, 13.7)    | 12.7 (11.1, 14.4)    | 0.29    | 12.3 (10.5, 14.7)    | 13.1 (11.6, 14.3)     | 0.27    |
| Categorised zinc           | Normal | 260 (85.8%)          | 46 (82.1%)           | 0.48    | 21 (75.0%)           | 25 (89.3%)            | 0.25    |
|                            | Low    | 43 (14.2%)           | 10 (17.9%)           |         | 7 (25.0%)            | 3 (10.7%)             |         |
| Copper Level, median (IQR) |        | 17.6 (15.2, 20.5)    | 18.6 (16.3, 21.8)    | 0.099   | 18.6 (16.0, 20.9)    | 19.4 (16.4, 23.0)     | 0.20    |
| Copper level               | Normal | 216 (71.3%)          | 45 (80.4%)           | 0.16    | 22 (78.6%)           | 23 (82.1%)            | 0.36    |
|                            | Low    | 87 (28.7%)           | 11 (19.6%)           |         | 6 (21.4%)            | 5 (17.9%)             |         |
| Folate, median (IQR)       |        | 21.3 (16.0, 26.5)    | 23.5 (17.4, 28.7)    | <0.001  | 23.5 (17.0, 28.5)    | 23.4 (18.2, 29.1)     | 0.295   |
| Categorised folate         | Normal | 744 (100.0%)         | 372 (100.0%)         |         | 228 (100.0%)         | 144 (100.0%)          |         |
| Vitamin B12, median (IQR)  |        | 243.0 (194.0, 326.0) | 239.0 (186.0, 324.5) | 0.71    | 224.0 (176.0, 299.0) | 263.0 (206.0, 371.5)  | 0.0143  |
| Vitamin B12                | Normal | 678 (91.3%)          | 338 (90.9)           | 0.83    | 203 (89.0%)          | 135 (93.8%)           | 0.29    |



|  |     |           |           |  |            |          |  |
|--|-----|-----------|-----------|--|------------|----------|--|
|  |     |           | %)        |  |            |          |  |
|  | Low | 65 (8.7%) | 34 (9.1%) |  | 25 (11.0%) | 9 (6.3%) |  |

*Abbreviations: Fe (iron), Mg (magnesium), Zn (zinc), Cu (copper), SD (standard deviation), IQR (inter-quartile range). The normal ranges for the micronutrients are as follows (14): Mg (0.66 to 1.07 mmol/L), Fe (9 to 27  $\mu$ mol/L), Zn (11.5 to 21.4  $\mu$ mol/L), Cu (15.7 to 31.4  $\mu$ mol/L), folate (4.1 to 20.4 nmol/L), vitamin B12 (147.5 to 590 pmol/L)*

The boxplots in Figure 1 and Table 2 show a comparison of the levels of micronutrients between participants without diabetes, those with controlled diabetes and participants with uncontrolled diabetes. The mean Mg level was significantly higher in participants with controlled diabetes compared to those with uncontrolled diabetes (0.81 mmol/L (SD 0.07) vs 0.76 mmol/L (SD 0.07), respectively,  $P < 0.001$ ) (Table 2 & Fig. 1). The median vitamin B12 levels were significantly higher in participants with uncontrolled diabetes compared to participants with either controlled or without diabetes (Table 2). There were no significant differences between the three groups in the remaining micronutrients (Table 2).

**Fig. 1: Boxplots comparing selected micronutrient levels across the three groups**

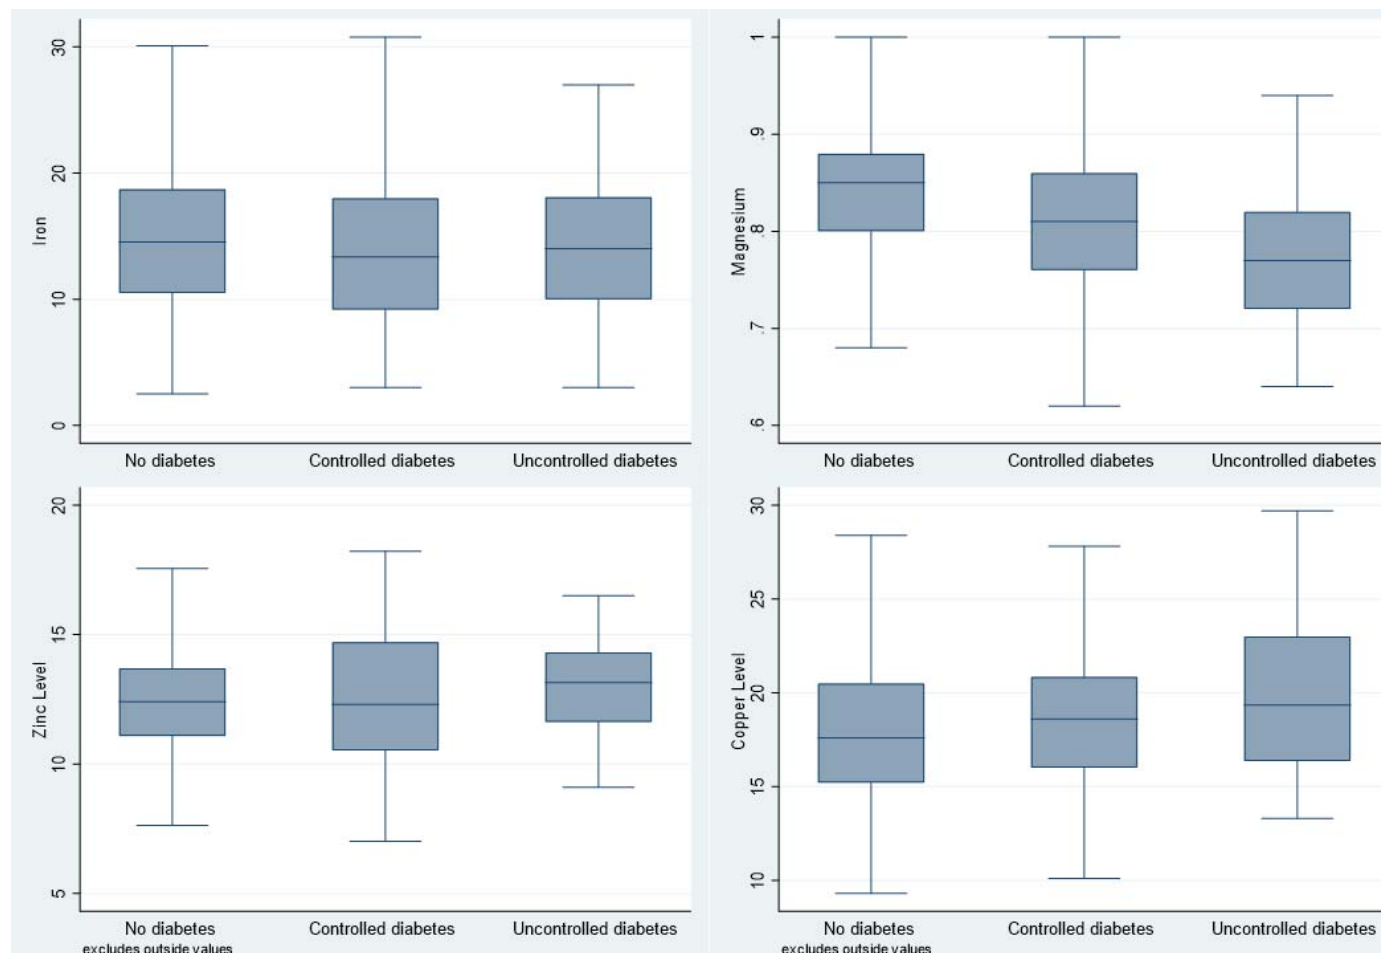

### Association between diabetes and micronutrients– multivariable logistic regression

After multivariable logistic regression, diabetes, compared to no diabetes, was significantly associated with a 3-fold odds of having low magnesium (OR 3.32, 95% CI 2.47-4.47,  $p < 0.001$ ), a 49% increase in the odds of having low iron (OR 1.49, 95% CI 1.03 – 2.16,  $p = 0.034$ ). Diabetes was also associated with a 49% increase in the odds of having low Zn, although with weak evidence against the null hypothesis ( $p = 0.334$ ) (Table 3).

### Association between micronutrients and controlled diabetes – multivariable multinomial logistic regression.

In further stratified analyses, uncontrolled diabetes was associated with 5.6-fold increased odds of having low magnesium (OR 5.57, 95% CI 3.65-8.57,  $p < 0.001$ ) and two-fold increased odds of having low iron (OR 1.75, 95% CI 1.01-3.03,  $p = 0.047$ ). These associations were still observed in

participants with controlled diabetes, but they were noticeably weaker (Table 3). Lastly, in participants with controlled diabetes, diabetes was associated with two-and-a-half-fold increase in the odds of having low Zn, although there was weak evidence against the null hypothesis at the study's sample size (Table 3).

**Table 3. Association between controlled diabetes and micronutrients – Multivariable multinomial logistic regression.**

| Micronutrient | All Diabetes |         |             | Controlled diabetes |         |             | Uncontrolled diabetes |         |             |
|---------------|--------------|---------|-------------|---------------------|---------|-------------|-----------------------|---------|-------------|
|               | OR           | p-value | 95%CI       | OR                  | p-value | 95%CI       | OR                    | p-value | 95%CI       |
| Mg            | 3.32         | 0.000   | 2.47 - 4.47 | 2.47                | 0.000   | 1.75 - 3.48 | 5.57                  | 0.000   | 3.65 - 8.52 |
| Fe            | 1.49         | 0.034   | 1.03 - 2.16 | 1.38                | 0.141   | 0.90 - 2.11 | 1.75                  | 0.047   | 1.01 - 3.03 |
| Zn            | 1.49         | 0.336   | 0.66 - 3.34 | 2.47                | 0.063   | 0.95 - 6.41 | 0.62                  | 0.531   | 0.14 - 2.77 |
| Cu            | 0.68         | 0.382   | 0.28 - 1.62 | 1.17                | 0.784   | 0.38 - 3.59 | 0.35                  | 0.125   | 0.09 - 1.34 |
| Vitamin B12   | 1.17         | 0.508   | 0.74 - 1.84 | 1.37                | 0.231   | 0.82 - 2.27 | 0.84                  | 0.641   | 0.40 - 1.76 |

*Abbreviations: Fe (iron), Mg (magnesium), Zn (zinc), Cu (copper), OR (odds ratio), CI (confidence interval). Adjusted for age, gender, BMI, smoking, and income.*

## Discussion

In this case control study, we found lower serum levels for Mg and Fe in participants with diabetes, compared to those without diabetes. After adjusting for confounders, low magnesium and low iron were significantly associated with a diabetes. These association showed higher effect magnitudes in participants with uncontrolled diabetes compared to those with controlled diabetes.

Low magnesium was significantly associated with a 3-fold increase in diabetes risk and a 6-fold increase in the risk of uncontrolled diabetes. Consistent with our finding, one study showed Mg levels were lower in uncontrolled diabetes compared to controlled diabetes (18). Further, similar to our findings, a meta-analysis of 13 cohort studies with 536,318 participants reported a significant inverse association between Mg intake and risk of type 2 diabetes (19). Experimental studies suggest that magnesium supplementation may have benefit in people with

diabetes. A meta-analysis of 21 RCTs showed that supplementation with Mg significantly improved insulin sensitivity and glucose tolerance (20). Mg works as an insulin sensitizer by regulating the tyrosine kinase activity of insulin's receptor (21). In diabetes, insulin resistance decreases renal Mg reabsorption, resulting in urinary Mg wasting. Thus, people with diabetes may end up in a vicious circle in which hypomagnesemia enhances insulin resistance and insulin resistance causes hypomagnesemia (22). Our findings, in addition to published data, suggest that magnesium supplementation may help in reducing the risk of diabetes and enhancing diabetes control.

Diabetes was associated with a 13 folds increase in the odds of having low iron, and the effect was worse in participants with uncontrolled diabetes. Further, low Zn levels were associated with diabetes although with weak evidence against the null hypothesis. Several *in vitro* (23-25) and *in vivo* studies (26) suggest that Zn may have benefits in both reducing the risk of diabetes and better diabetes control through its action on both  $\beta$  cell function and insulin action. Experimental studies also suggested that Zn is beneficial in better control of diabetes (27).

Our study is a case control study, but the measurements were done in a cross-sectional method, therefore, does not enable us to establish temporality, i.e. that abnormalities in the nutrients were present before the development of diabetes. Another limitation is that we were not able to collect data on physical exercise, diet, and alcohol consumption, which are important as they could be confounders. Our study is the first on this topic in Qatar, a country that has a relatively high prevalence of diabetes that is expected to increase in the future. This study provides data about the association between micronutrients and diabetes in a relatively affluent population. Our study also provides data on differences in the levels of these micronutrients between participants with controlled and uncontrolled diabetes. Whether these differences are a result of diabetes pathophysiological processes or due to nutritional supplementation, it requires further and more robust research. Another area of further research would be whether Mg supplementation may result in better levels of diabetes control, as our observational data suggest.

## Conclusion

In an affluent setting in the MENA region, diabetes was associated with low magnesium and low iron, and this association was worse in individuals with uncontrolled diabetes.

## Abbreviations

Fe (Iron), Mg (Magnesium), Zn (Zinc), Cu (Copper), MENA (Middle East and North Africa), HbA1c (glycated hemoglobin), BMI (Body Mass Index), HDL (High Density Lipoprotein), LDL (Low Density Lipoprotein), BP (Blood Pressure), OR (Odds Ratio), CI (Confidence Interval),  $\beta$  (beta coefficient), RCT (Randomized Control Trial)

## Acknowledgements

We would like to express our gratitude to Qatar Biobank for providing us with the needed data in a short period of time. We also would like to thank Professor Suhail Doi and Dr. George Hindy for providing guidance and useful critiques to our research work.

## Author contributions

All the authors contributed to the conception, design, conduct, analysis and writing up of the study.

## Conflict of interest

All authors declare no conflict of interest.

## Funding

No funding to report.

## References

1. Saeedi P, Petersohn I, Salpea P, Malanda B, Karuranga S, Unwin N, et al. Global and regional diabetes prevalence estimates for 2019 and projections for 2030 and 2045: Results from the International Diabetes Federation Diabetes Atlas, 9(th) edition. *Diabetes Res Clin Pract.* 2019;157:107843.
2. Pazirandeh S, Burns DL, Griffin IJ. Overview of dietary trace elements. In: Seres D, Hoppin AG, editors. *UpToDate*. UpToDate2020.
3. Siddiqui K, Bawazeer N, Joy SS. Variation in macro and trace elements in progression of type 2 diabetes. *ScientificWorldJournal.* 2014;2014:461591.
4. Takaya J, Higashino H, Kobayashi Y. Intracellular magnesium and insulin resistance. *Magnes Res.* 2004;17(2):126-36.

5. Sanjeevi N, Freeland-Graves J, Beretvas SN, Sachdev PK. Trace element status in type 2 diabetes: A meta-analysis. *J Clin Diagn Res.* 2018;12(5):Oe01-oe8.
6. Parekh D, Sarathi V, Shivane VK, Bandgar TR, Menon PS, Shah NS. Pilot study to evaluate the effect of short-term improvement in vitamin D status on glucose tolerance in patients with type 2 diabetes mellitus. *Endocr Pract.* 2010;16(4):600-8.
7. von Hurst PR, Stonehouse W, Coad J. Vitamin D supplementation reduces insulin resistance in South Asian women living in New Zealand who are insulin resistant and vitamin D deficient - a randomised, placebo-controlled trial. *Br J Nutr.* 2010;103(4):549-55.
8. Bourlon PM, Billaudel B, Faure-Dussert A. Influence of vitamin D3 deficiency and 1,25 dihydroxyvitamin D3 on de novo insulin biosynthesis in the islets of the rat endocrine pancreas. *J Endocrinol.* 1999;160(1):87-95.
9. Valdés-Ramos R, Guadarrama-López AL, Martínez-Carrillo BE, Benítez-Arciniega AD. Vitamins and type 2 diabetes mellitus. *Endocr Metab Immune Disord Drug Targets.* 2015;15(1):54-63.
10. Akbari M, Tabrizi R, Lankarani KB, Heydari ST, Karamali M, Kashanian M, et al. The Effects of Folate Supplementation on Diabetes Biomarkers Among Patients with Metabolic Diseases: A Systematic Review and Meta-Analysis of Randomized Controlled Trials. *Horm Metab Res.* 2018;50(2):93-105.
11. Zhu J, Xun P, Bae JC, Kim JH, Kim DJ, Yang K, et al. Circulating calcium levels and the risk of type 2 diabetes: a systematic review and meta-analysis. *Br J Nutr.* 2019;122(4):376-87.
12. Zhao JV, Schooling CM, Zhao JX. The effects of folate supplementation on glucose metabolism and risk of type 2 diabetes: a systematic review and meta-analysis of randomized controlled trials. *Ann Epidemiol.* 2018;28(4):249-57.e1.
13. Rhys Williams (Chair) SCDC, Reem Almutairi, Pablo Aschner Montoya, Abdul, Basit DB, Stéphane Besançon, Christian Bommer, Wenche Borgnakke, Edward Boyko, Dominic, Bright JC, Gisela Dahlquist, Hema Divakar, Alireza Esteghamati, Nita Forouhi, Laercio Franco,, Edward Gregg LG, Mohamed Hassanein, Calvin Ke, Dinky Levitt, Lee-Ling Lim, Ayesha, Motala GO, Katherine Ogurstova, David Owens, Chris Patterson, Meda Pavkov, Jonathan, Pearson-Stuttard AR, Wolfgang Rathmann, Musarrat Riaz, Gojka Roglic, Jonathan, et al. IDF DIABETES ATLAS Ninth edition. IDF DIABETES ATLAS. November 2019.
14. UpToDate. Laboratory test normal reference ranges in adults. Waltham, MA: UpToDate; 2020.
15. Si Hassen W, Castetbon K, Cardon P, Enaux C, Nicolaou M, Lien N, et al. Socioeconomic Indicators Are Independently Associated with Nutrient Intake in French Adults: A DEDIPAC Study. *Nutrients.* 2016;8(3):158.
16. Rabi DM, Edwards AL, Southern DA, Svenson LW, Sargious PM, Norton P, et al. Association of socio-economic status with diabetes prevalence and utilization of diabetes care services. *BMC Health Serv Res.* 2006;6:124.
17. Alberg A. The influence of cigarette smoking on circulating concentrations of antioxidant micronutrients. *Toxicology.* 2002;180(2):121-37.
18. Farid SM. Trace mineral status related to levels of glycated hemoglobin of type 2 diabetic subjects in Jeddah, Saudi Arabia. *Medical Journal of Islamic World Academy of Sciences.* 2013;21(2):47-56.

19. Dong JY, Xun P, He K, Qin LQ. Magnesium intake and risk of type 2 diabetes: meta-analysis of prospective cohort studies. *Diabetes Care*. 2011;34(9):2116-22.
20. Simental-Mendía LE, Sahebkar A, Rodríguez-Morán M, Guerrero-Romero F. A systematic review and meta-analysis of randomized controlled trials on the effects of magnesium supplementation on insulin sensitivity and glucose control. *Pharmacol Res*. 2016;111:272-82.
21. Pham PC, Pham PM, Pham SV, Miller JM, Pham PT. Hypomagnesemia in patients with type 2 diabetes. *Clin J Am Soc Nephrol*. 2007;2(2):366-73.
22. Gommers LM, Hoenderop JG, Bindels RJ, de Baaij JH. Hypomagnesemia in Type 2 Diabetes: A Vicious Circle? *Diabetes*. 2016;65(1):3-13.
23. Al-Marroof RA, Al-Sharbatti SS. Serum zinc levels in diabetic patients and effect of zinc supplementation on glycemic control of type 2 diabetics. *Saudi Med J*. 2006;27(3):344-50.
24. Simon SF, Taylor CG. Dietary zinc supplementation attenuates hyperglycemia in db/db mice. *Exp Biol Med (Maywood)*. 2001;226(1):43-51.
25. Chen MD, Liou SJ, Lin PY, Yang VC, Alexander PS, Lin WH. Effects of zinc supplementation on the plasma glucose level and insulin activity in genetically obese (ob/ob) mice. *Biol Trace Elem Res*. 1998;61(3):303-11.
26. Cruz KJ, de Oliveira AR, Marreiro Ddo N. Antioxidant role of zinc in diabetes mellitus. *World J Diabetes*. 2015;6(2):333-7.
27. Jayawardena R, Ranasinghe P, Galappatthy P, Malkanthi R, Constantine G, Katulanda P. Effects of zinc supplementation on diabetes mellitus: a systematic review and meta-analysis. *Diabetol Metab Syndr*. 2012;4(1):13.
